# Supplementary material for: Unexpected reactivity of two-coordinate palladium–carbene complexes; synthetic and catalytic implications
Source: Royal Society of Chemistry journal article supplement (doi:10.1039/b104297c), 2001-01-01
Supplement: b104297c.doc [file b104297c.doc]

Unexpected Reactivity of Two-Coordinate Palladium-Carbene Complexes; Synthetic and Catalytic Implications

Lisa R. Titcomb,a Stephen Caddick,a* F. Geoffrey N. Cloke,a* D. James. F. Wilson,a Darren McKerrecher,b

aThe Chemistry Laboratory, C.P.E.S., University of Sussex, Falmer, Brighton, BN1 9QJ, UK.

bAstraZeneca Pharmaceuticals, Mereside, Macclesfield, Cheshire, SK10 4TF, UK.

## Supplementary Material

Experimental procedures and spectroscopic data for complexes 2-6 S2

Ligand substitution reactions S3

General procedure for coupling reactions S5

References S5

# General Methods

Unless otherwise stated, all experimental procedures were carried out using standard high vacuum and Schlenk techniques, under an atmosphere of dry argon, or under dinitrogen in an MBraun or a Miller-Howe glove box. Glassware was dried in an oven at 150 ˚C prior to use. THF and hexanes were distilled from potassium metal, toluene from sodium metal and pentane from sodium pottasium alloy under dinitrogen prior to use; *d*6-benzene and *d*8-toluene were dried over molten potassium then vacuum transferred to a storage ampoule under argon prior to use. NMR spectra were recorded at 295 K on a Bruker DPX 300 MHz spectrometer, with chemical shifts () reported in ppm, relative to the residual proton chemical shifts of the internal deuterated solvent (1H and 13C) set relative to external TMS. 31P NMR chemical shifts were referenced to 85 % H3PO4 as external standard. Coupling constants are quoted in Hz. Electron impact mass spectra were recorded on a VG Autospec mass spectrometer. Elemental analyses were carried out by Mikroanalytisches Labor Pascher, Remagen-Bandorf, Germany. *p*-Chlorotoluene, morpholine, dibutylamine, hexylamine, aniline, N-methylaniline, benzophenoneimine and tri-*o*-tolylphosphine were purchased from Aldrich and used as received. Tricyclohexylphosphine was purchased from Aldrich and recrystallized from anyhdrous ethanol. Potassium *tert*-butoxide was purchased from Aldrich and sublimed twice at 157 ˚C, 1  10-5 mbar. Anhydrous dioxane was purchased from Aldrich and stored in an ampoule under argon over 4 Å molecular sieves. 1,3-Bis-(2,6-diisopropylphenyl)imidazolin-2-ylidene,[[1]](#endnote-2) [{Pd(3-C4H7)Cl}2],[[2]](#endnote-3) bis-(1,3-di-*tert*-butylimidazol-2-ylidene)palladium(0),[[3]](#endnote-4) [Pd{P(*o*-tolyl)3}2][[4]](#endnote-5) and 1,3-di-*tert*-butylimidazol-2-ylidene[[5]](#endnote-6) were synthesised according to literature procedures.

**Synthesis of (1,3-di-*tert*-butylimidazol-2-ylidene)(tri-*o*-tolylphosphine)palladium(0) 2**

To a solution of [Pd{P(*o*-tolyl)3}2] (200 mg, 0.280 mmol) in toluene (20 mL) was added 1,3-di-*tert*-butylimidazol-2-ylidene (50 mg, 0.280 mmol) in toluene (20 mL). The mixture was stirred for 10 mins after which a clear yellow solution resulted. The solution was concentrated and cooled to –50 C to yield a yellow crystalline solid. The filtrate was removed *via cannula* and the product washed with cold toluene (3 x 5 mL) to yield **2** as a yellow crystalline compound (92 mg, 56 % yield). 1H NMR (*d*6-benzene)  1.83 (s, 18H, C(CH3)3), 1.33 (s, 9H, *o*-CH3), 6.59 (s, 2H, NCHCHN), 6.98-7.41 (m, 12H, aromatic CH). 13C{1H} NMR (*d*6-benzene)  24.1 (d, *o*-CH3, 3*J*(PC) = 16.6 Hz), 32.0 (s, C(CH3)3), 57.4 (s, C(CH3)3), 114.4 (s, NCHCHN), 125.9 (d, *J*(CP) = 6.0 Hz), 128.6 (s, broad), 131.4 (d, *J*(CP) = 6.0 Hz) 133.0 (d, *J*(CP) = 6.8 Hz), 135.2 (d, *J*(CP) = 28.7 Hz), 143.4 (d, *J*(CP) = 15.9 Hz) (aromatic CH’s and C’s), 191.6 (d, NCN 2*J*(CP) = 86.0 Hz). 31P{1H} NMR (*d*6-benzene)  6.1 (s, P(*o*-tol)3). EIMS *m/z* 590 (M+, 10 %). Anal. Calc’d. for C32H41N2PdP: C: 65.03, H: 6.99, N: 4.74; Found C: 65.10, H: 6.98, N: 4.68.

**Synthesis of (1,3-bis(2,6-diisopropylphenyl)imidazolin-2-ylidene)(tri-*o*-tolylphosphine)palladium(0) 3**

To a solution of [Pd{P(*o*-tolyl)3}2] (300 mg, 0.420 mmol) in toluene (30 mL) was added 1,3-bis(2,6-diisopropylphenyl)imidazolin-2-ylidene (164 mg, 0.420 mmol) in toluene (20 mL). The mixture was stirred for 10 mins after which a clear yellow solution resulted. The toluene was removed and pentane (20 mL) was added. The product crystallized after 4 hours at room temperature. The filtrate was removed *via cannula* and the product washed with cold pentane (3 x 5 mL) to yield **3** as a yellow crystalline compound (242 mg, 72 % yield). 1H NMR (*d*6-benzene)  1.29 (d, 12H, CH(CH3)2, 3*J*(HH) = 6.9 Hz), 1.46 (d, 12H, CH(CH3)2, 3*J*(HH) = 6.9 Hz), 2.58 (s, 9H, *o*-CH3), 3.32-3.41 (m, 4H, CH(CH3)2, 3*J*(HH) = 6.9 Hz), 3.39 (s, 4H, NCH2CH2N), 6.81-7.34 (m, 18H, aromatic CH). 13C{1H} NMR (*d*6-benzene)  23.7 (d, *o*-CH3, 3*J*(PC) = 15.1 Hz), 24.3 (s, CH(CH3)2), 25.3 (s, CH(CH3)2), 29.0 (s, CH(CH3)2), 53.1 (s, NCH2CH2N), 124.1 (s), 125.4 (d, *J*(CP) = 6.8 Hz), 128.4 (s, broad), 128.5 (s) 130.9 (d, *J*(CP) = 6.0 Hz), 133.5 (d, *J*(CP) = 9.1 Hz), 134.1 (d, *J*(CP) = 27.9 Hz), 138.3 (s), 143.5 (d, *J*(CP) = 15.1 Hz), 147.3 (s) (aromatic CH’s and C’s), 218.4 (d, NCN 2*J*(CP) = 84.5 Hz). 31P{1H} NMR (*d*6-benzene)  6.8 (s, P(*o*-tol)3). EIMS *m/z* 800 (M+, 50 %). Anal. Calc’d. for C48H55N2PdP: C: 72.31, H: 6.95, N: 3.51; Found C: 71.90, H: 7.50, N: 3.53.

**Synthesis of bis(1,3-bis(2,6-diisopropylphenyl)imidazolin-2-ylidene)palladium(0) 4**

1,3-bis(2,6-diisopropylphenyl)imidazolin-2-ylidene (792 mg, 2.03 mmol), [{Pd(3-C4H7)Cl}2] (200 mg, 0.508 mmol) and sodium dimethylmalonate (157 mg, 1.02 mmol) were placed in an ampoule and THF was added (40 mL). The mixture was heated at 60 C for 16 h with stirring after which the solution was bright orange. The solvent was removed *in vacuo* and the product extracted with toluene (3 x 20 mL). The toluene solution was concentrated and cooled to –50 C to yield an orange crystalline solid. The filtrate was removed *via cannula* and the product washed with cold toluene (3 x 5 mL) to yield **4** as an orange crystalline solid (567 mg, 63 % yield). 1H NMR (*d*6-benzene)  1.20 (d, 24H, CH(CH3)2, 3*J*(HH) = 6.9 Hz), 1.21 (d, 24H, CH(CH3)2, 3*J*(HH) = 6.9 Hz), 3.11-3.14 (m, 8H, CH(CH3)2, 3*J*(HH) = 6.9 Hz), 3.12 (s, 8H, NCH2CH2N), 7.07 (d, 8H, *m*-CH, 3*J*(HH) = 7.7 Hz), 7.24 (t, 4H, *p*-CH, 3*J*(HH) = 7.7 Hz). 13C{1H} NMR (*d*6-benzene)  24.2 (CH(CH3)2), 25.7 (CH(CH3)2), 28.7 (sCH(CH3)2), 53.4 (NCH2CH2N), 124.0 (aromatic CH), 128.0 (aromatic CH), 139.6 (aromatic C), 146.9 (aromatic C), 218.5 (NCN). EIMS *m/z* 887 (M+, 56 %). Anal. Calc’d. for C54H76N4Pd: C: 73.07, H: 8.63, N: 6.31; Found C: 73.15, H: 8.68, N: 6.48.

**Synthesis of (1,3-di-*tert*-butylimidazol-2-ylidene)(tricyclohexylphosphine)palladium(0) 5**

Bis(1,3-di-*tert*-butylimidazol-2-ylidene)palladium(0) (214 mg, 0.459 mmol) and tricyclohexylphosphine (128 mg, 0.459 mmol) were weighed into a Schlenk tube and toluene (30 mL) added. The mixture was stirred for 30 mins and filtered *via cannula*. The toluene was removed and the free 1,3-di-*tert*-butylimidazol-2-ylidene was removed *in vacuo* (70˚C/10-2mbar) employing a liquid nitrogen cooled cold finger. Compound **5** was obtained as a yellow solid (165 mg, 63 % yield). 1H NMR (*d*6-benzene)  1.25-1.37 (m, 9H, Cy-H), 1.68-1.84 (m, 19H, Cy-H), 2.00 (s, 18H, C(CH3)3), 2.28-2.32 (m. 5H, Cy-H), 6.60 (s, 2H, NCHCHN). 13C{1H} NMR (*d*6-benzene)  27.3 (s, Cy-C), 28.3 (d, Cy-C, *J*(CP) = 10.6 Hz), 32.1 (d, Cy-C, *J*(CP) = 6.4 Hz), 32.4 (s, C(CH3)3), 35.3 (d, Cy-C, *J*(CP) = 12.6 Hz), 57.6 (s, C(CH3)3), 113.9, (s, NCHCHN) 194.0 (d, NCN, 2*J*(CP) = 86.8 Hz). 31P{1H} NMR (*d*6-benzene)  50.3 (PCy3). EIMS *m/z* 566 (M+, 32 %).

**Synthesis of (1,3-di-*tert*-butylimidazol-2-ylidene)(1,3-bis-(2,6-diisopropylphenyl)imidazolin-2-ylidene)palladium(0) 6**

To a stirred toluene solution (10 mL) of bis(1,3-di-*tert*-butylimidazol-2-ylidene)palladium(0) (97 mg, 0.21 mmol) was added a toluene solution (10 mL) of 1,3-bis(2,6-diisopropylphenyl)imidazolin-2-ylidene (81.5 mg, 0.21 mmol). The reaction mixture was stirred for 12 h resulting in a bright orange solution. The solvent was removed *in vacuo* and free 1,3-di-*tert*-butylimidazol-2-ylidene was sublimed onto a liquid nitrogen cooled cold finger. The orange residue was dissolved in hexanes, concentrated and cooled to –50 C to yield an orange crystalline solid. The filtrate was removed *via cannula* and the product washed with cold hexanes (3 x 5 mL) to yield **6** as an orange crystalline solid (80 mg, 58 % yield). 1H NMR (*d*8-toluene)  1.21 (d, 12H, CH(CH3)2, 3*J*(HH)= 6.8 Hz), 1.47 (s, 18H, C(CH3)3), 1.58 (d, 12H, CH(CH3)2, 3*J*(HH)= 6.8 Hz), 3.45 (sept., 4H, CH(CH3)2, 3*J*(HH)= 6.8 Hz), 3.50 (s, 4H, CH2CH2), 6.40 (s, 2H, CHCH) 7.19 – 7.09 (m, 6H, aromatic CH) ppm. 13C{1H} NMR (*d*6-benzene)  24.8 (CH(CH3)2), 25.2 (CH(CH3)2), 29.1 (CH(CH3)2), 32.1 (C(CH3)3), 52.9 (NCH2CH2N), 56.9 C(CH3)3), 113.6 (CH=CH), 124.0 (aromatic CH), 127.6 (aromatic CH), 140.0 (aromatic C), 147.2 (aromatic C),194.3 (ButNCNBut) 220.7 (NCN) ppm. EIMS *m/z* 676 (M+, 75 %).

**Ligand substitution reactions**

**Reaction of bis(1,3-di-*tert*-butylimidazol-2-ylidene)palladium(0) with tri-*o*-tolylphosphine**

Bis(1,3-di-*tert*-butylimidazol-2-ylidene)palladium(0) (50 mg, 0.107 mmol) and tri-*o*-tolylphosphine (33 mg, 0.107 mmol) were weighed into a 5 mL Youngs NMR tube and *d*6-benzene (0.6 mL) was added. No reaction was observed at ambient temperature. The mixture was heated at 60 C for 16 h. NMR integration showed a ratio of (1,3-di-*tert*-butylimidazol-2-ylidene)(tri-*o*-tolylphosphine)palladium(0) to tri-*o*-tolylphosphine of 1.1:2.2. Further heating for 48 h did not result in a change in the NMR spectrum.

**Reaction of bis(1,3-di-*tert*-butylimidazol-2-ylidene)palladium(0) with tricyclohexylphosphine**

Bis(1,3-di-*tert*-butylimidazol-2-ylidene)palladium(0) (50 mg, 0.107 mmol) and tricyclohexylphosphine (30 mg, 0.107 mmol) were weighed into a 5 mL Youngs NMR tube and *d*6-benzene (0.6 mL) was added. 31P{1H} NMR : spectrum obtained after 10 min. showed only a singlet at  50.3 ppm, attributable to the mixed species.

**Reaction of bis(1,3-di-*tert*-butylimidazol-2-ylidene)palladium(0) with bis(tri-*o*-tolylphosphine)palladium(0)**

Bis(1,3-di-*tert*-butylimidazol-2-ylidene)palladium(0) (50 mg, 0.070 mmol) and bis(tri-*o*-tolylphosphine)palladium(0) (33 mg, 0.070 mmol) were weighed into a 5 mL Youngs NMR tube and *d*6-benzene (0.6 mL) was added. The mixture was heated at 60 C for 16 h. NMR integration showed a ratio of (1,3-di-*tert*-butylimidazol-2-ylidene)(tri-*o*-tolylphosphine)palladium(0)to bis(tri-*o*-tolylphosphine)palladium(0) to tri-*o*-tolylphosphine of 10:0.3:0.7

**Reaction of bis(1,3-bis(2,6-diisopropylphenyl)imidazolin-2-ylidene)palladium(0) with tri-*o*-tolylphosphine**

Bis(1,3-bis(2,6-diisopropylphenyl)imidazolin-2-ylidene)palladium(0) (28 mg, 0.032 mmol) and tri-*o*-tolylphosphine (9.6 mg, 0.032 mmol) were weighed into a 5 mL Youngs NMR tube and *d*6-benzene (0.6 mL) was added. NMR integration showed a ratio of (1,3-bis(2,6-diisopropylphenyl)imidazolin-2-ylidene)(tri-*o*-tolylphosphine)palladium(0) to tri-*o*-tolylphosphine of 1.0:2.6. Heating the mixture at 60 C for 16 h resulted in no significant change in the NMR spectrum.

**Reaction of bis(1,3-bis(2,6-diisopropylphenyl)imidazolin-2-ylidene)palladium(0) with bis(tri-*o*-tolylphosphine)palladium(0)**

Bis(1,3-bis(2,6-diisopropylphenyl)imidazolin-2-ylidene)palladium(0) (28 mg, 0.034 mmol) and bis(tri-*o*-tolylphosphine)palladium(0) (24 mg, 0.034 mmol) were weighed into a 5 mL Youngs NMR tube and *d*6-benzene (0.6 mL) was added. The mixture was heated at 60 C for 16 h. NMR integration showed a ratio of (1,3-bis(2,6-diisopropylphenyl)imidazolin-2-ylidene)(tri-*o*-tolylphosphine)palladium(0) to bis(tri-*o*-tolylphosphine)palladium(0) tri-*o*-tolylphosphine of 1:0.5:1.5

**Reaction of bis(1,3-bis-(2,6-diisopropylphenyl)imidazolin-2-ylidene)palladium(0) with 1,3-di-*tert*-butylimidazol-2-ylidene.**

Bis(1,3-bis(2,6-diisopropylphenyl)imidazolin-2-ylidene)palladium(0) (10.6 mg, 0.12 mmol) and 1,3-di-*tert*-butylimidazol-2-ylidene (2.2 mg, 0.12 mmol) were weighed into a 5 mm Youngs NMR tube. *d*8-Toluene (0.6 mL) was added and the reaction monitored by NMR spectroscopy. The reaction was found to reach equilibrium after 6h. NMR integration showed a ratio of bis(1,3-bis(2,6-diisopropylphenyl)imidazolin-2-ylidene)palladium(0) to (1,3-di-*tert*-butylimidazol-2-ylidene)(1,3-bis(2,6-diisopropylphenyl)imidazolin-2-ylidene)palladium(0) of 1.0:2.0.

**Reaction of bis(1,3-di-*tert*-butylimidazol-2-ylidene)palladium(0) with bis(1,3-bis-(2,6-diisopropylphenyl)imidazolin-2-ylidene)palladium(0).**

Bis(1,3-bis(2,6-diisopropylphenyl)imidazolin-2-ylidene)palladium(0) (10 mg, 0.11 mmol) and bis(1,3-di-*tert*-butylimidazol-2-ylidene)palladium(0) (5.3 mg, 0.11 mmol) were weighed into a 5 mm Youngs NMR tube. *d*8-Toluene (0.6 mL) was added and the reaction monitored by NMR spectroscopy. The reaction was found to show complete conversion to the mixed product (1,3-di-*tert*-butylimidazol-2-ylidene)(1,3-bis-(2,6-diisopropylphenyl)imidazolin-2-ylidene) palladium(0) after 2 h.

**General procedure for coupling reactions**

The catalyst (0.16 mmol) and KO*t*Bu (133 mg, 1.19 mmol) were weighed into a Youngs tap ampoule in a glovebox and sealed. The ampoule was removed from the glovebox and a septum fitted under a flow of argon. Dioxane (10 mL) was added. Chlorotoluene (100 mg, 0.79 mmol) followed by the amine (0.95 mmol) were injected through the septum into the ampoule. The mixture was heated at 100 ˚C for 1-5 h. The reaction was judged to be complete by HPLC analysis and the mixture was then cooled to ambient temperature. The solvent was removed *in vacuo* and the mixture filtered through a silica plug with 20 % EtOAc/hexane. All coupling products were found to be identical by 1H, 13C{1H}nmr and EIMS with literature data. All coupling products have been previously reported: 1-(4-methlphenyl)morpholine,[[6]](#endnote-7) N,N-dibutyl-*p*-toluidine,Error: Reference source not found N-hexyl-*p*-toluidine,Error: Reference source not found N-phenyl-*p*-toluidine,[[7]](#endnote-8) N-methyl-N-phenyl-*p*-toluidine,Error: Reference source not found N-benzhydrylidene-*p*-toluidine.[[8]](#endnote-9)

1. Arduengo, A. J.; Krafczyk, R.; Schmuter, R. *Tetrahedron*, **1999**, *55*, 14523. [↑](#endnote-ref-2)
2. Tatsuno Y.; Yoshida, T.; Otsuka S. *Inorganic Synth*. John Wiley & Sons, **1990**, *28*, 342. [↑](#endnote-ref-3)
3. Caddick, S.; Cloke, F. G. N.; Clentsmith, G. K. B.; Hitchcock, P. B.; McKerrecher, D.; Titcomb, L. R.; Williams, M. R. V. *J. Orgmet. Chem.* **2001**, *617*, 635. [↑](#endnote-ref-4)
4. Paul, F.; Patt, J.; Hartwig, J. F. *Organometallics*, **1995**, *14*, 3030. [↑](#endnote-ref-5)
5. Arnold, P. L.; Cloke, F. G. N.; Geldbach, T.; Hitchcock, P. B. *Organometallics,* **1999**, *18*, 3228. [↑](#endnote-ref-6)
6. Wolfe, J. P.; Buchwald, S L. *J. Org. Chem.* **1996**, *61*, 1133. [↑](#endnote-ref-7)
7. Hamann, B. C.; Hartwig, J. F. *J. Am. Chem. Soc.* **1998**, *120*, 7369. [↑](#endnote-ref-8)
8. Nongkunsarn, P; Ramsden, C. A. *Tetrahedron*, **1997**, *53*, 3805. [↑](#endnote-ref-9)
